# Supplementary material
Source: PubMed Central journal article supplement (PMC2651292)
Supplement: 0810169106_0810169106SI.pdf [file 0810169106_0810169106SI.pdf]

# Supporting Information

Krüger et al. 10.1073/pnas.0810169106

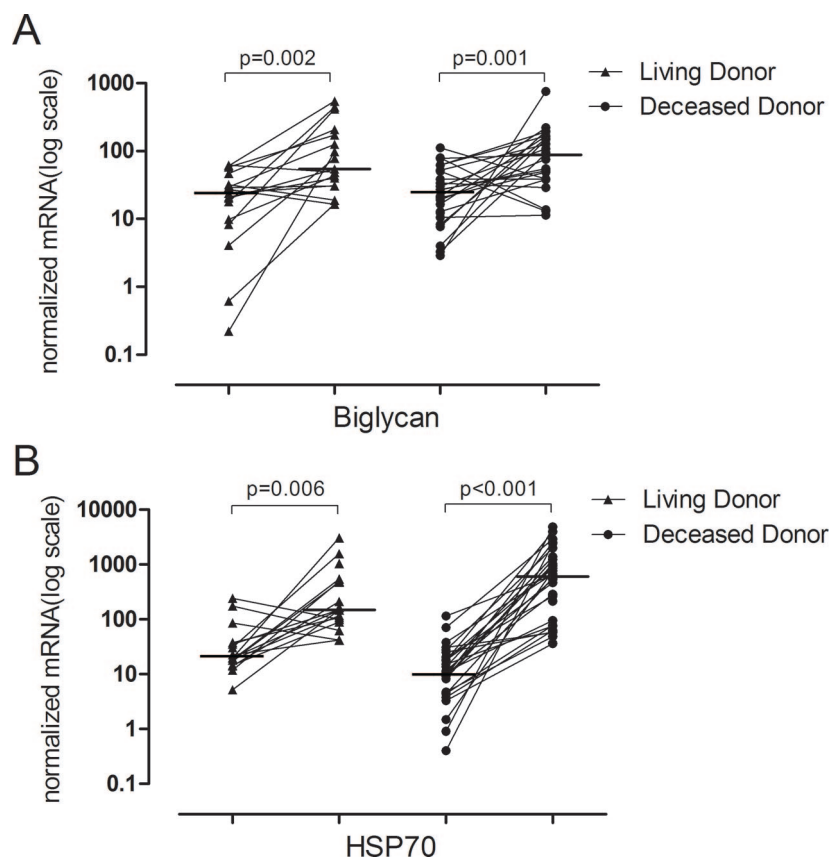

**Fig. S1.** Biglycan and HSP70 gene expression in implantation biopsies. (A) Biglycan and (B) HSP70 mRNA expression levels were analyzed in pre- and postanastomosis biopsies of living donors ( $n = 18$ ) and deceased donors ( $n = 28$ ). Both genes were significantly up-regulated after reperfusion. HSP70 was significantly lower in preanastomosis deceased-donor kidneys when compared with living donors ( $P = 0.02$ ). No differences were found in preanastomosis HSP70 gene expression or in the postanastomosis levels of HSP70 and biglycan. Scatter-dot blot shows the medians for normalized mRNA.  $P$  values were calculated using Wilcoxon matched pairs test or Mann-Whitney U test.
